# Supplementary material for: Genetic and Epigenetic Somatic Alterations in Head and Neck Squamous Cell Carcinomas Are Globally Coordinated but Not Locally Targeted
Source: PLoS One. 2010 Mar 11;5(3):e9651. doi: 10.1371/journal.pone.0009651 (PMC2836370; doi:10.1371/journal.pone.0009651)
Supplement: Table S1 — Top 25 differentially altered genes by DNA methylation and copy number alteration. (0.03 MB DOC) [file pone.0009651.s002.xls]

## Sheet: Sheet1
Supplementary Table 1. Top 25 Differentially Altered Genes by DNA Methylation and Copy Number Alteration
	Estimate	p-value	q-value
Methylation Alteration
SEMA3C	-0.3489	<0.0001	0.0001
HOXA9	0.3195	<0.0001	0.0001
PI3	-0.1919	<0.0001	0.0001
ADCYAP1	0.3691	<0.0001	0.0001
HTR1B	0.389	<0.0001	0.0001
AIM2	-0.3196	<0.0001	0.0001
TRY1,PRSS1	-0.2277	<0.0001	0.0001
TERT	0.3826	<0.0001	0.0001
HS3ST2	0.2837	<0.0001	0.0002
GABRG3	-0.1566	<0.0001	0.0002
SOX1	0.3177	<0.0001	0.0002
ICAM1	-0.1353	<0.0001	0.0002
INS-IGF2	-0.1162	<0.0001	0.0002
SPP1	-0.2483	<0.0001	0.0003
AOC3	-0.2316	<0.0001	0.0004
MPL	-0.1475	<0.0001	0.0004
EMR3	-0.1678	<0.0001	0.0005
SOX17	0.3119	<0.0001	0.0006
GADD45A	-0.1235	<0.0001	0.0006
AGXT	-0.2268	0.0001	0.0006
EPHA5	0.2376	0.0001	0.0006
MME	0.2753	0.0001	0.001
ITK	-0.1673	0.0001	0.001
CTLA4	-0.1016	0.0001	0.001
NPY	0.2788	0.0001	0.0011
Copy Number Alteration
CCDC36	-0.188	<0.0001	0.0031
USP4	-0.1844	<0.0001	0.0031
QARS	-0.1608	<0.0001	0.0049
CD97	-0.1181	<0.0001	0.008
QRICH1	-0.1631	<0.0001	0.008
VPS41	0.0811	<0.0001	0.008
INSR	-0.1041	<0.0001	0.008
ZNF430	-0.0788	<0.0001	0.008
TIMM44	-0.094	<0.0001	0.008
DALRD3	-0.1666	<0.0001	0.008
HDAC9	0.0975	<0.0001	0.008
TCTA	-0.1381	<0.0001	0.008
ITGB8	0.0927	<0.0001	0.008
AMT	-0.1366	<0.0001	0.008
NICN1	-0.1356	<0.0001	0.008
MRPL45	-0.0733	<0.0001	0.008
EIF3G	-0.1113	<0.0001	0.008
C19orf66	-0.105	<0.0001	0.008
ZNF557	-0.0999	<0.0001	0.008
P4HTM	-0.1736	<0.0001	0.008
MACC1	0.0858	<0.0001	0.008
CDC25A	-0.1386	<0.0001	0.008
A4GALT	-0.0683	<0.0001	0.008
CAMP	-0.1343	<0.0001	0.008
ZNF589	-0.1299	<0.0001	0.008
