# Supplementary material for: Genetic and Epigenetic Somatic Alterations in Head and Neck Squamous Cell Carcinomas Are Globally Coordinated but Not Locally Targeted
Source: PLoS One. 2010 Mar 11;5(3):e9651. doi: 10.1371/journal.pone.0009651 (PMC2836370; doi:10.1371/journal.pone.0009651)
Supplement: Table S2 — Local analysis of genes reported to undergo hypermethylation and LOH. (0.03 MB DOC) [file pone.0009651.s003.xls]

## Sheet: Sheet1
Supplmentary Table 2. Local Analysis of Genes Reported to Undergo Hypermethylation and LOH
	Methylation Range (Median b) for 19 samples	Frequency of Methylation >0.04	Frequency of Locus Deletion at Promoter	Sites with Methylation* and Deletion	Frequency of Locus Amplification
Loci
CDKN2A_E121_R	0.03-0.08 (0.04)	0.526316	0.157895	3/3	0.105263
p16_seq_47_S188_R	0.03-0.9 (0.04)	0.473684	0.157895	2/3	0.105263
p16_seq_47_S85_F	0.25-0.86 (0.49)	1	0.157895	3/3	0.105263
RASSF1_E116_F	0.02-0.04 (0.02)	0.0526316	0.157895	0/3	0
RASSF1_P244_F	0.02-0.13 (0.02)	0.210526	0.157895	0/3	0
MGMT_P272_R	0.03-0.15 (0.04)	0.578947	0	0/0	0
MGMT_P281_F	0.02-0.59 (0.04)	0.473684	0	0/0	0
DAPK1_E46_R	0.08-0.64 (0.23)	1	0.0526316	0/0	0
DAPK1_P10_F	0.02-0.72 (0.06)	0.789474	0.0526316	0/0	0
DAPK1_P345_R	0.02-0.82 (0.05)	0.631579	0.0526316	0/0	0
CDH1_P45_F	0.04-0.13 (0.09)	0.947368	0.0526316	0/0	0
CDH1_P52_R	0.04-0.23 (0.07)	0.947368	0.0526316	0/0	0
GSTP1_E322_R	0.02-0.26 (0.04)	0.421053	0	0/0	0.315789
GSTP1_P74_F	0.03-0.11 (0.07)	0.947368	0	0/0	0.315789
GSTP1_seq_38_S153_R	0-0.03 (0.03)	0	0	0/0	0.315789
*Methylation cutoff = 4%
